# Supplementary material for: UMAMIT14 is an amino acid exporter involved in phloem unloading in Arabidopsis roots
Source: PubMed Central journal article supplement (PMC5181585; doi:10.1093/jxb/erw412), 2016-11-17
Supplement: supp_erw412_Supplementary_tables_S1_7.pdf [file supp_erw412_Supplementary_tables_S1_7.pdf]

Usually Multiple Acids Move In and out Transporters 14 is an Arabidopsis amino acid exporter involved in phloem unloading of amino acids in roots

Supplemental tables S1-7

Table S1. List of primers used. Primers sequences are given from 5' to 3'. Underlined lower case represents bases added for the creation of *attB1* and *attB2* in forward and reverse primers, respectively.

| Name                                      | Type    | Sequence                                                     |
|-------------------------------------------|---------|--------------------------------------------------------------|
| UMAMIT14 promoter                         | Forward | <u>acaagtttg</u> tacaaaaagcaggcttCACTAAAATATTTACATTGACC      |
|                                           | Reverse | accactttgtacaagaaagctgggtCTCATGTTTTTAAAGCCATATCTCAACGTAG     |
| UMAMIT14 promoter (for modifying pWYTKan) | Forward | GAGAAGATCTCTCGAGGTACAAAAAGCAGGCTGGCACTAAAATATTACATTGACC      |
|                                           | Reverse | TATAGAGCTCTGTTTTTAAAGCCATATCTCAACGTAG                        |
| UMAMIT14 genomic                          | Forward | <u>acaagtttg</u> tacaaaaagcaggcttGATATGGCTTTAAAAACATGGAAG    |
|                                           | Reverse | accactttgtacaagaaagctgggtCTCAGACTGATTCATTGGTGTTAGGCCT        |
| UMAMIT14 CDS                              | Forward | <u>gacaagtttg</u> tacaaaaagcaggcttAGATATGGCTTTAAAAACATGGAAG  |
|                                           | Reverse | gaccactttgtacaagaaagctgggtACYAGACTGATTCATTGGTGTTAGGCCT       |
| UMAMIT14 CDS (venus fusion)               | Forward | GAGAGTCGACACCATGGCTTTAAAAACATGGAAG                           |
|                                           | Reverse | ATATAGCGCTTGCGACTGATTCATTGGTGTTAGG                           |
| UMAMIT18 CDS                              | Forward | <u>gacaagtttg</u> tacaaaaagcaggcttCAATAAAGATGAAAGGTGGAAGCATG |
|                                           | Reverse | gaccactttgtacaagaaagctgggtACYAGGTACTGGTAACCACACCGTTAGT       |
| UMAMIT14 T-DNA detection                  | Forward | CTATCAAAATTGCATTACTTAGTGG                                    |
| UMAMIT14 T-DNA detection                  | Reverse | GGCGATACGACGCTAGAACGTGAG                                     |
| Actin2 qPCR                               | Forward | GGTAACATTGTGCTCAGTGGTGG                                      |
|                                           | Reverse | AACGACCTTAATCTTCATGCTGC                                      |
| UMAMIT14 qPCR                             | Forward | ATGGTCATTGTTGCGATCTT                                         |
|                                           | Reverse | TGGTTCGTCTTTGCTTTTTTC                                        |

Table S2. Relative abundance of amino acids secreted by yeast expressing UMAMIT14 and UMAMIT18. Amino acid contents represented in Figure 2 were used. The average of content obtained for the empty plasmid was subtracted to the content of each biological replicates of UMAMIT14 and UMAMIT18. Each value, which represents amino acid secretion above the background level, was divided by the sum of these normalized values, and expressed as a percentage. Stars indicate significant difference between UMAMIT14 and UMAMIT18 results (t-test; p-value<0.5). GABA: gamma-amino-butyric acid.

|          | Gln+<br>Arg* | Ala* | Glu* | Ser* | Gly* | Asn | Asp* | Pro* | Thr | Val* | Cys | His | Lys | Ile* | Leu* | Met | GABA | Phe  |
|----------|--------------|------|------|------|------|-----|------|------|-----|------|-----|-----|-----|------|------|-----|------|------|
| UMAMIT18 | 77.8         | 5.8  | 3.7  | 1.8  | 1.8  | 1.7 | -0.4 | 1.1  | 2.3 | 2.0  | 0.5 | 0.7 | 0.0 | 0.5  | 0.2  | 0.0 | 0.0  | 0.06 |
| UMAMIT14 | 43.3         | 27.6 | 7.7  | 5.9  | 4.6  | 2.0 | 1.1  | 2.5  | 2.5 | 1.7  | 0.0 | 0.4 | 0.0 | 0.4  | 0.3  | 0.0 | 0.0  | 0.06 |





Table S5. Amino acid secreted by *umamit* mutants. The data are the ones used in Figure 6. Plants were grown for two weeks in liquid J medium supplemented with 20 mM NH<sub>4</sub>NO<sub>3</sub>; the medium was replaced with fresh J medium and collected after three days for analysis. Values are expressed in nmol.mg<sup>-1</sup> DW. Significant differences (p<0.05) are indicated by different letters according to one-way ANOVA in conjunction with Tukey's test (n=6 biological replicates).

|                                        | Ala         | Asn         | Asp         | Gaba        | Gln         | Glu         | Gly         | His         | Ile         | Leu         | Phe         | Ser         | Thr         | Val         | Total        |
|----------------------------------------|-------------|-------------|-------------|-------------|-------------|-------------|-------------|-------------|-------------|-------------|-------------|-------------|-------------|-------------|--------------|
| Wild Type                              | 1.26<br>(a) | 7.74<br>(a) | 1.03<br>(a) | 1.64<br>(a) | 15.3<br>(a) | 3.16<br>(a) | 3.23<br>(a) | 0.28<br>(a) | 0.12<br>(a) | 0.14<br>(a) | 0.15<br>(a) | 0.80<br>(a) | 0.46<br>(a) | 0.50<br>(a) | 35.43<br>(a) |
| <i>umamit14-1</i>                      | 1.09<br>(a) | 5.83<br>(b) | 0.86<br>(a) | 0.98<br>(b) | 10.4<br>(b) | 2.57<br>(b) | 2.45<br>(b) | 0.21<br>(b) | 0.08<br>(b) | 0.09<br>(b) | 0.10<br>(a) | 0.56<br>(b) | 0.32<br>(b) | 0.11<br>(a) | 26.80<br>(b) |
| <i>umamit18-1</i>                      | 0.79<br>(b) | 6.49<br>(a) | 0.85<br>(a) | 1.11<br>(b) | 8.11<br>(b) | 2.48<br>(b) | 2.67<br>(b) | 0.29<br>(a) | 0.07<br>(b) | 0.08<br>(b) | 0.16<br>(a) | 0.57<br>(b) | 0.30<br>(b) | 0.10<br>(b) | 24.04<br>(b) |
| <i>umamit14-1</i><br><i>umamit18-1</i> | 0.34<br>(c) | 3.07<br>(d) | 0.71<br>(b) | 0.47<br>(b) | 1.90<br>(c) | 1.74<br>(c) | 2.32<br>(b) | 0.29<br>(a) | 0.02<br>(c) | 0.02<br>(c) | 0.13<br>(a) | 0.32<br>(c) | 0.12<br>(c) | 0.03<br>(c) | 11.47<br>(c) |

Table S6. CPM and dry weight of samples used in the shoot-to-root transfer assay using [<sup>3</sup>H]Gln.

|                                        | Sample | CPM      |       |      |        |       | Dry weight (mg) |       |      |       |
|----------------------------------------|--------|----------|-------|------|--------|-------|-----------------|-------|------|-------|
|                                        |        | Fed leaf | Shoot | Root | Medium | Total | Fed leaf        | Shoot | Root | Total |
| WT                                     | 1      | 6908     | 716   | 24   | 88     | 7648  | 0.6             | 2.71  | 0.58 | 3.89  |
|                                        | 2      | 11967    | 2680  | 259  | 185    | 14907 | 0.4             | 2.88  | 0.72 | 4     |
|                                        | 3      | 11000    | 1702  | 88   | 156    | 12791 | 0.35            | 3.36  | 0.44 | 4.15  |
| <i>umamit14-1</i>                      | 1      | 9648     | 1884  | 81   | 36     | 11613 | 0.81            | 2.75  | 0.89 | 4.45  |
|                                        | 2      | 8101     | 1588  | 61   | 41     | 9750  | 0.47            | 2.88  | 1.1  | 4.45  |
|                                        | 3      | 13739    | 2803  | 138  | 51     | 16681 | 0.31            | 2.45  | 1.45 | 4.21  |
| <i>umamit14-1</i><br><i>umamit18-1</i> | 1      | 9374     | 3378  | 54   | 41     | 12807 | 0.71            | 2.72  | 1.19 | 4.62  |
|                                        | 2      | 6877     | 3620  | 114  | 41.8   | 10611 | 0.29            | 1.9   | 1.34 | 3.53  |
|                                        | 3      | 11742    | 3726  | 126  | 40.8   | 15595 | 0.33            | 2.97  | 0.96 | 4.26  |
| <i>umamit14-1</i><br><i>UMAMIT14</i>   | 4      | 7623     | 2361  | 43   | 31     | 10027 | 0.34            | 2.24  | 0.97 | 3.55  |
|                                        | 1      | 5729     | 1480  | 174  | 126    | 7383  | 0.62            | 2.44  | 1.01 | 4.07  |
|                                        | 2      | 7836     | 1098  | 144  | 112    | 9078  | 0.34            | 3.45  | 1.14 | 4.93  |
|                                        | 3      | 9343     | 953   | 77   | 89     | 10373 | 0.77            | 2.81  | 0.84 | 4.42  |

Table S7. CPM and dry weight of samples used in the shoot-to-root transfer assay using [<sup>14</sup>C]sucrose. n.d. means the radioactivity found in the sample was similar to the background.

|                                        | Sample | CPM      |       |       |        |       | Dry weight (mg) |        |       |       |
|----------------------------------------|--------|----------|-------|-------|--------|-------|-----------------|--------|-------|-------|
|                                        |        | Fed leaf | Shoot | Roots | Medium | Total | Fed leaf        | Shoots | Roots | Total |
| WT                                     | 1      | 5618     | 8982  | 3355  | n.d.   | 17955 | 0.35            | 2.85   | 1.07  | 4.27  |
|                                        | 2      | 8205     | 11955 | 1958  | n.d.   | 22118 | 0.42            | 3.16   | 0.98  | 4.56  |
|                                        | 3      | 8496     | 12928 | 2915  | n.d.   | 24339 | 0.27            | 3.52   | 0.62  | 4.41  |
| <i>umamit14-1</i>                      | 1      | 6806     | 4677  | 1574  | n.d.   | 13057 | 0.37            | 3.4    | 0.7   | 4.47  |
|                                        | 2      | 5552     | 8440  | 2281  | n.d.   | 16273 | 0.51            | 2.72   | 0.84  | 4.07  |
|                                        | 3      | 11804    | 6834  | 1626  | n.d.   | 20264 | 0.44            | 2.67   | 0.65  | 3.76  |
| <i>umamit14-1</i><br><i>umamit18-1</i> | 1      | 6707     | 9296  | 1625  | n.d.   | 17628 | 0.48            | 2.56   | 0.83  | 3.87  |
|                                        | 2      | 4679     | 4364  | 1805  | n.d.   | 10848 | 0.41            | 2.27   | 0.79  | 3.47  |
|                                        | 3      | 5687     | 9341  | 1926  | n.d.   | 16954 | 0.36            | 2.21   | 0.9   | 3.47  |
| <i>umamit14-1</i><br><i>UMAMIT14-1</i> | 1      | 5743     | 8070  | 2193  | n.d.   | 16006 | 0.43            | 2.97   | 0.85  | 4.25  |
|                                        | 2      | 4589     | 10473 | 2482  | n.d.   | 17544 | 0.37            | 2.7    | 0.67  | 3.74  |
|                                        | 3      | 9563     | 11386 | 3097  | n.d.   | 24046 | 0.33            | 2.33   | 0.41  | 3.07  |
